# Supplementary material for: Comparative analysis of mucosa-associated and luminal gut microbiota in pediatric ulcerative colitis
Source: Research Square preprint supplement (doi:10.21203/rs.3.rs-5301915/v1), 2024-10-28
Supplement: Supplementary file 1 [file 1467e2e85aeaa130045268bc.docx]

**
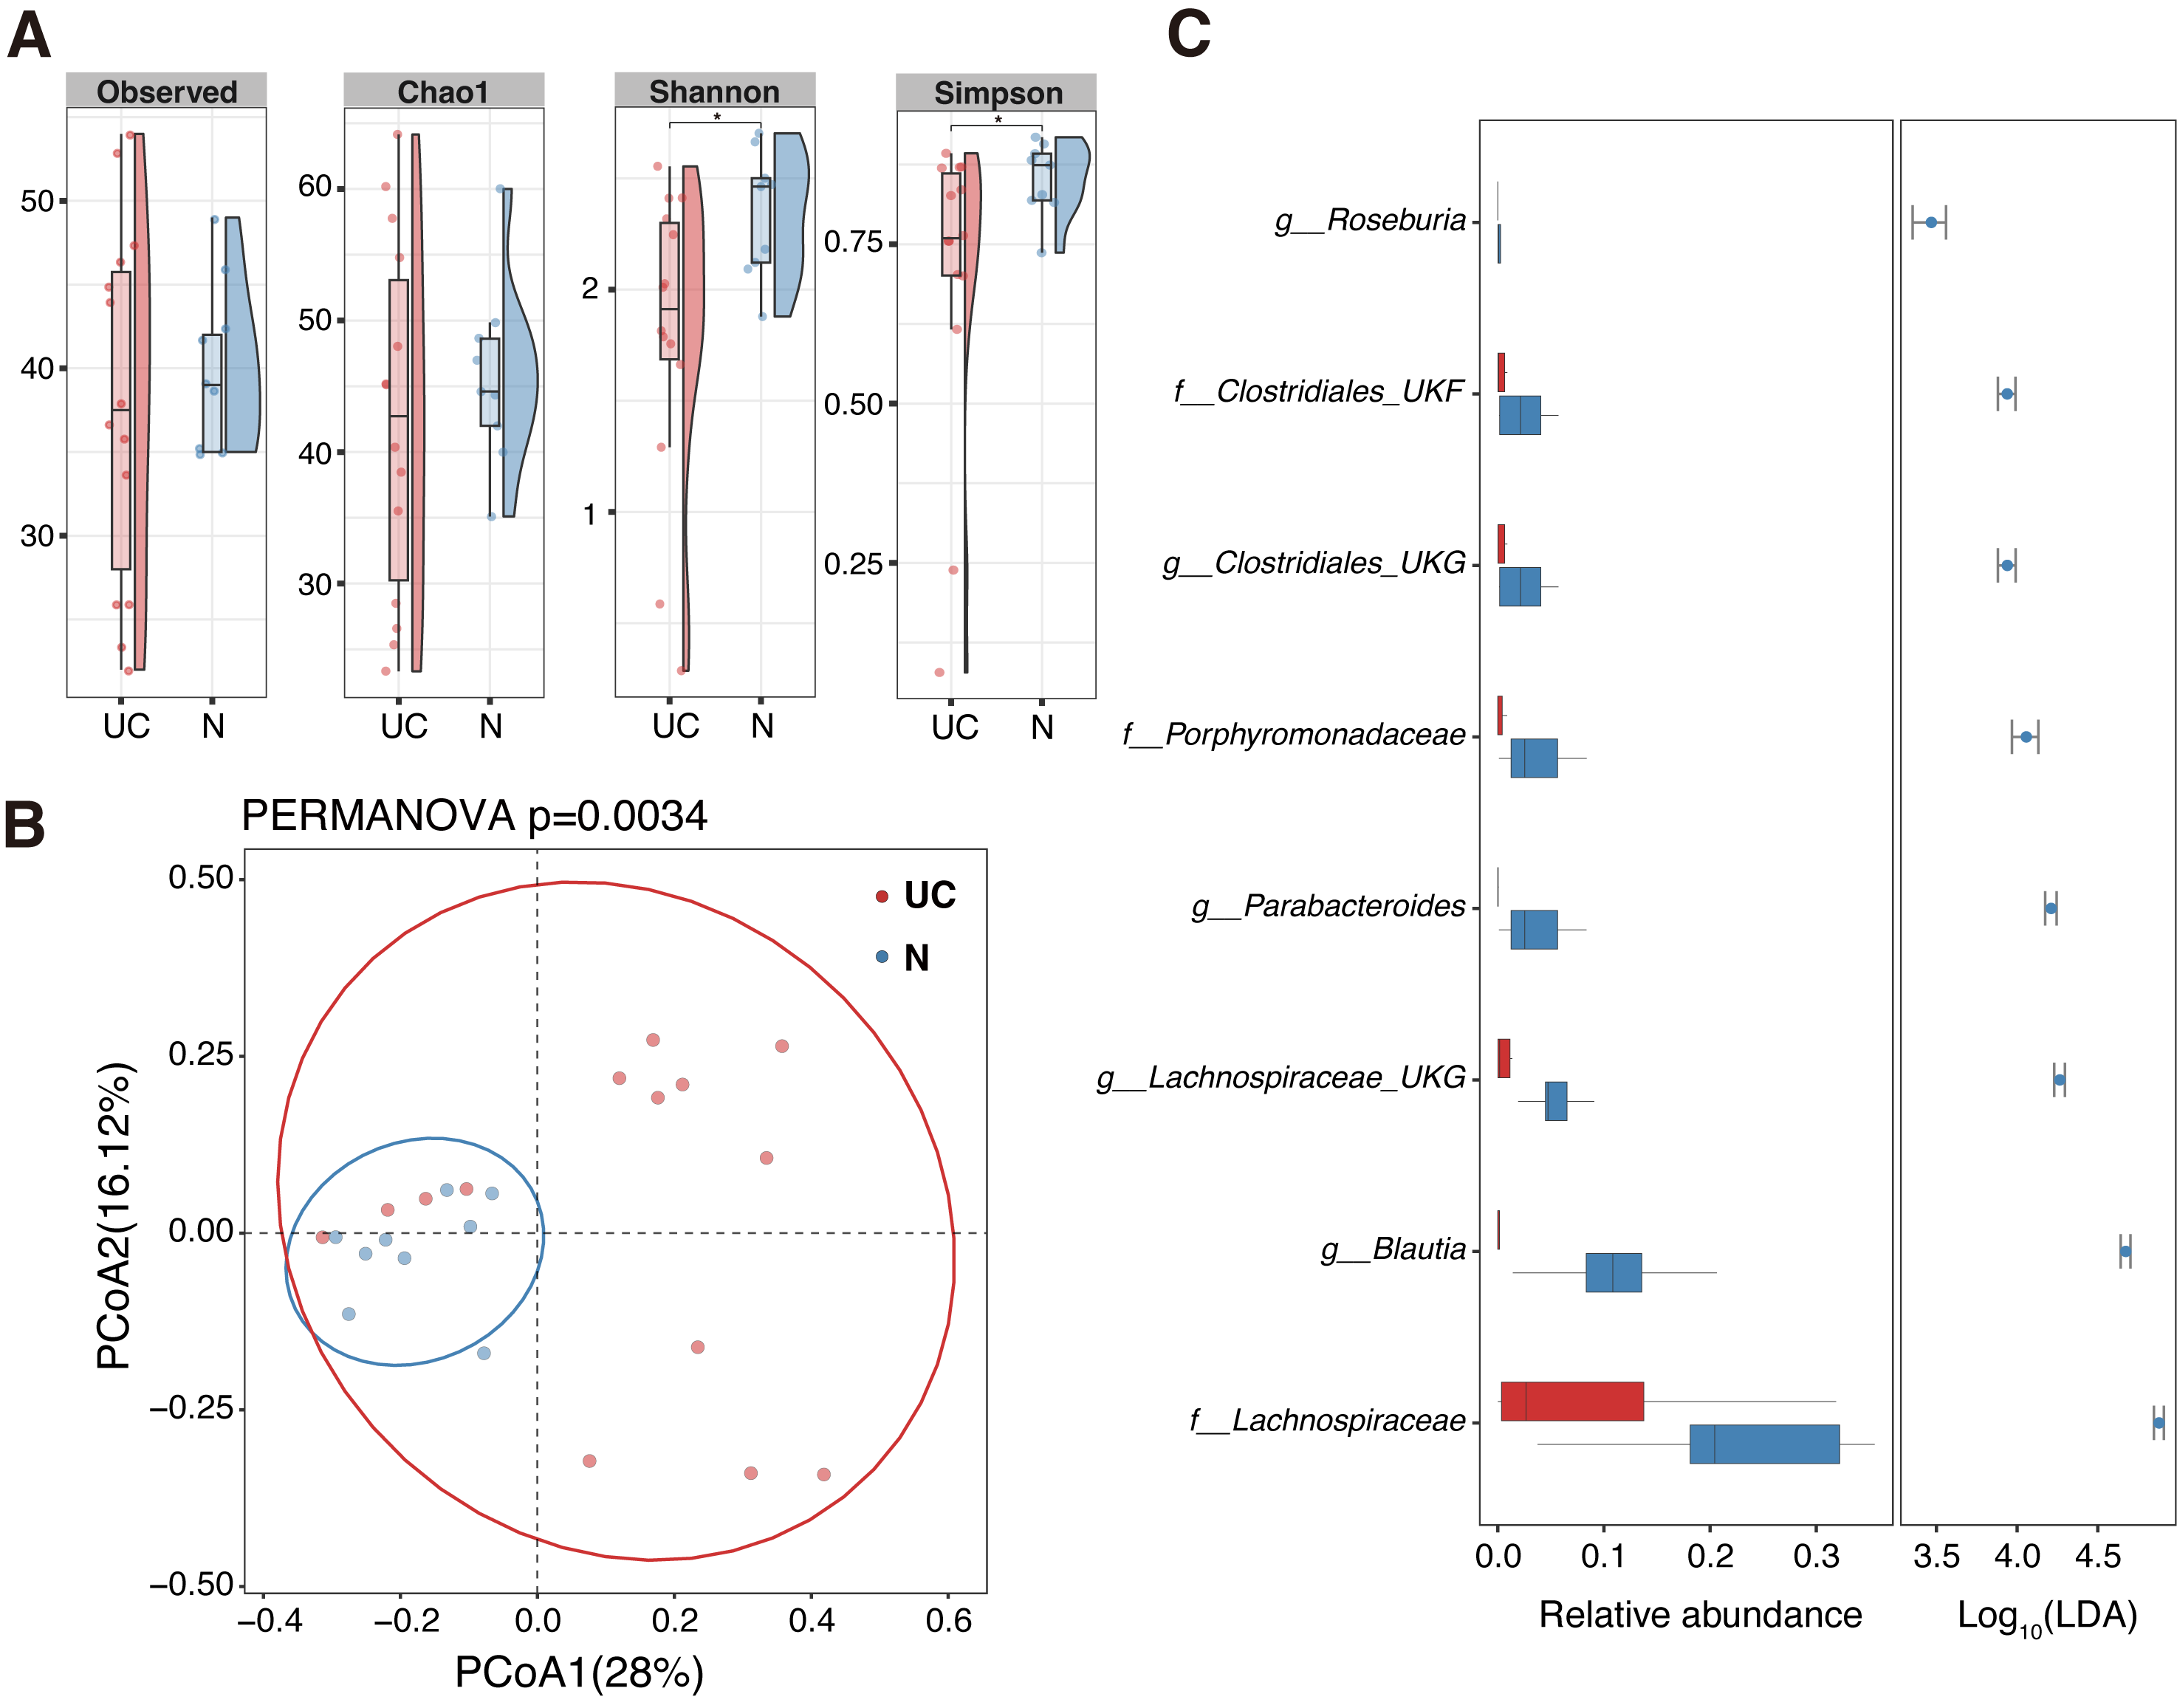
**

**Additional file 5. (A)** Comparison of diversity indices among the gut microbiome in feces. **(B)** PCoA of the gut microbiome in feces. The statistical difference in β-diversity was evaluated by PERMANOVA (number of permutations = 9,999). **(C)** Pairwise comparisons of the taxa that were significantly different between UC and N.

Abbreviations: LDA, linear discriminant analysis; N, non-IBD (non-inflammatory bowel disease); PCoA, principal coordinate analysis; UC, pediatric ulcerative colitis
