# Supplementary material for: Comparative analysis of mucosa-associated and luminal gut microbiota in pediatric ulcerative colitis
Source: Research Square preprint supplement (doi:10.21203/rs.3.rs-5301915/v1), 2024-10-28
Supplement: Supplementary file 2 [file 863f8c19e0b368720a9feeb5.docx]

**
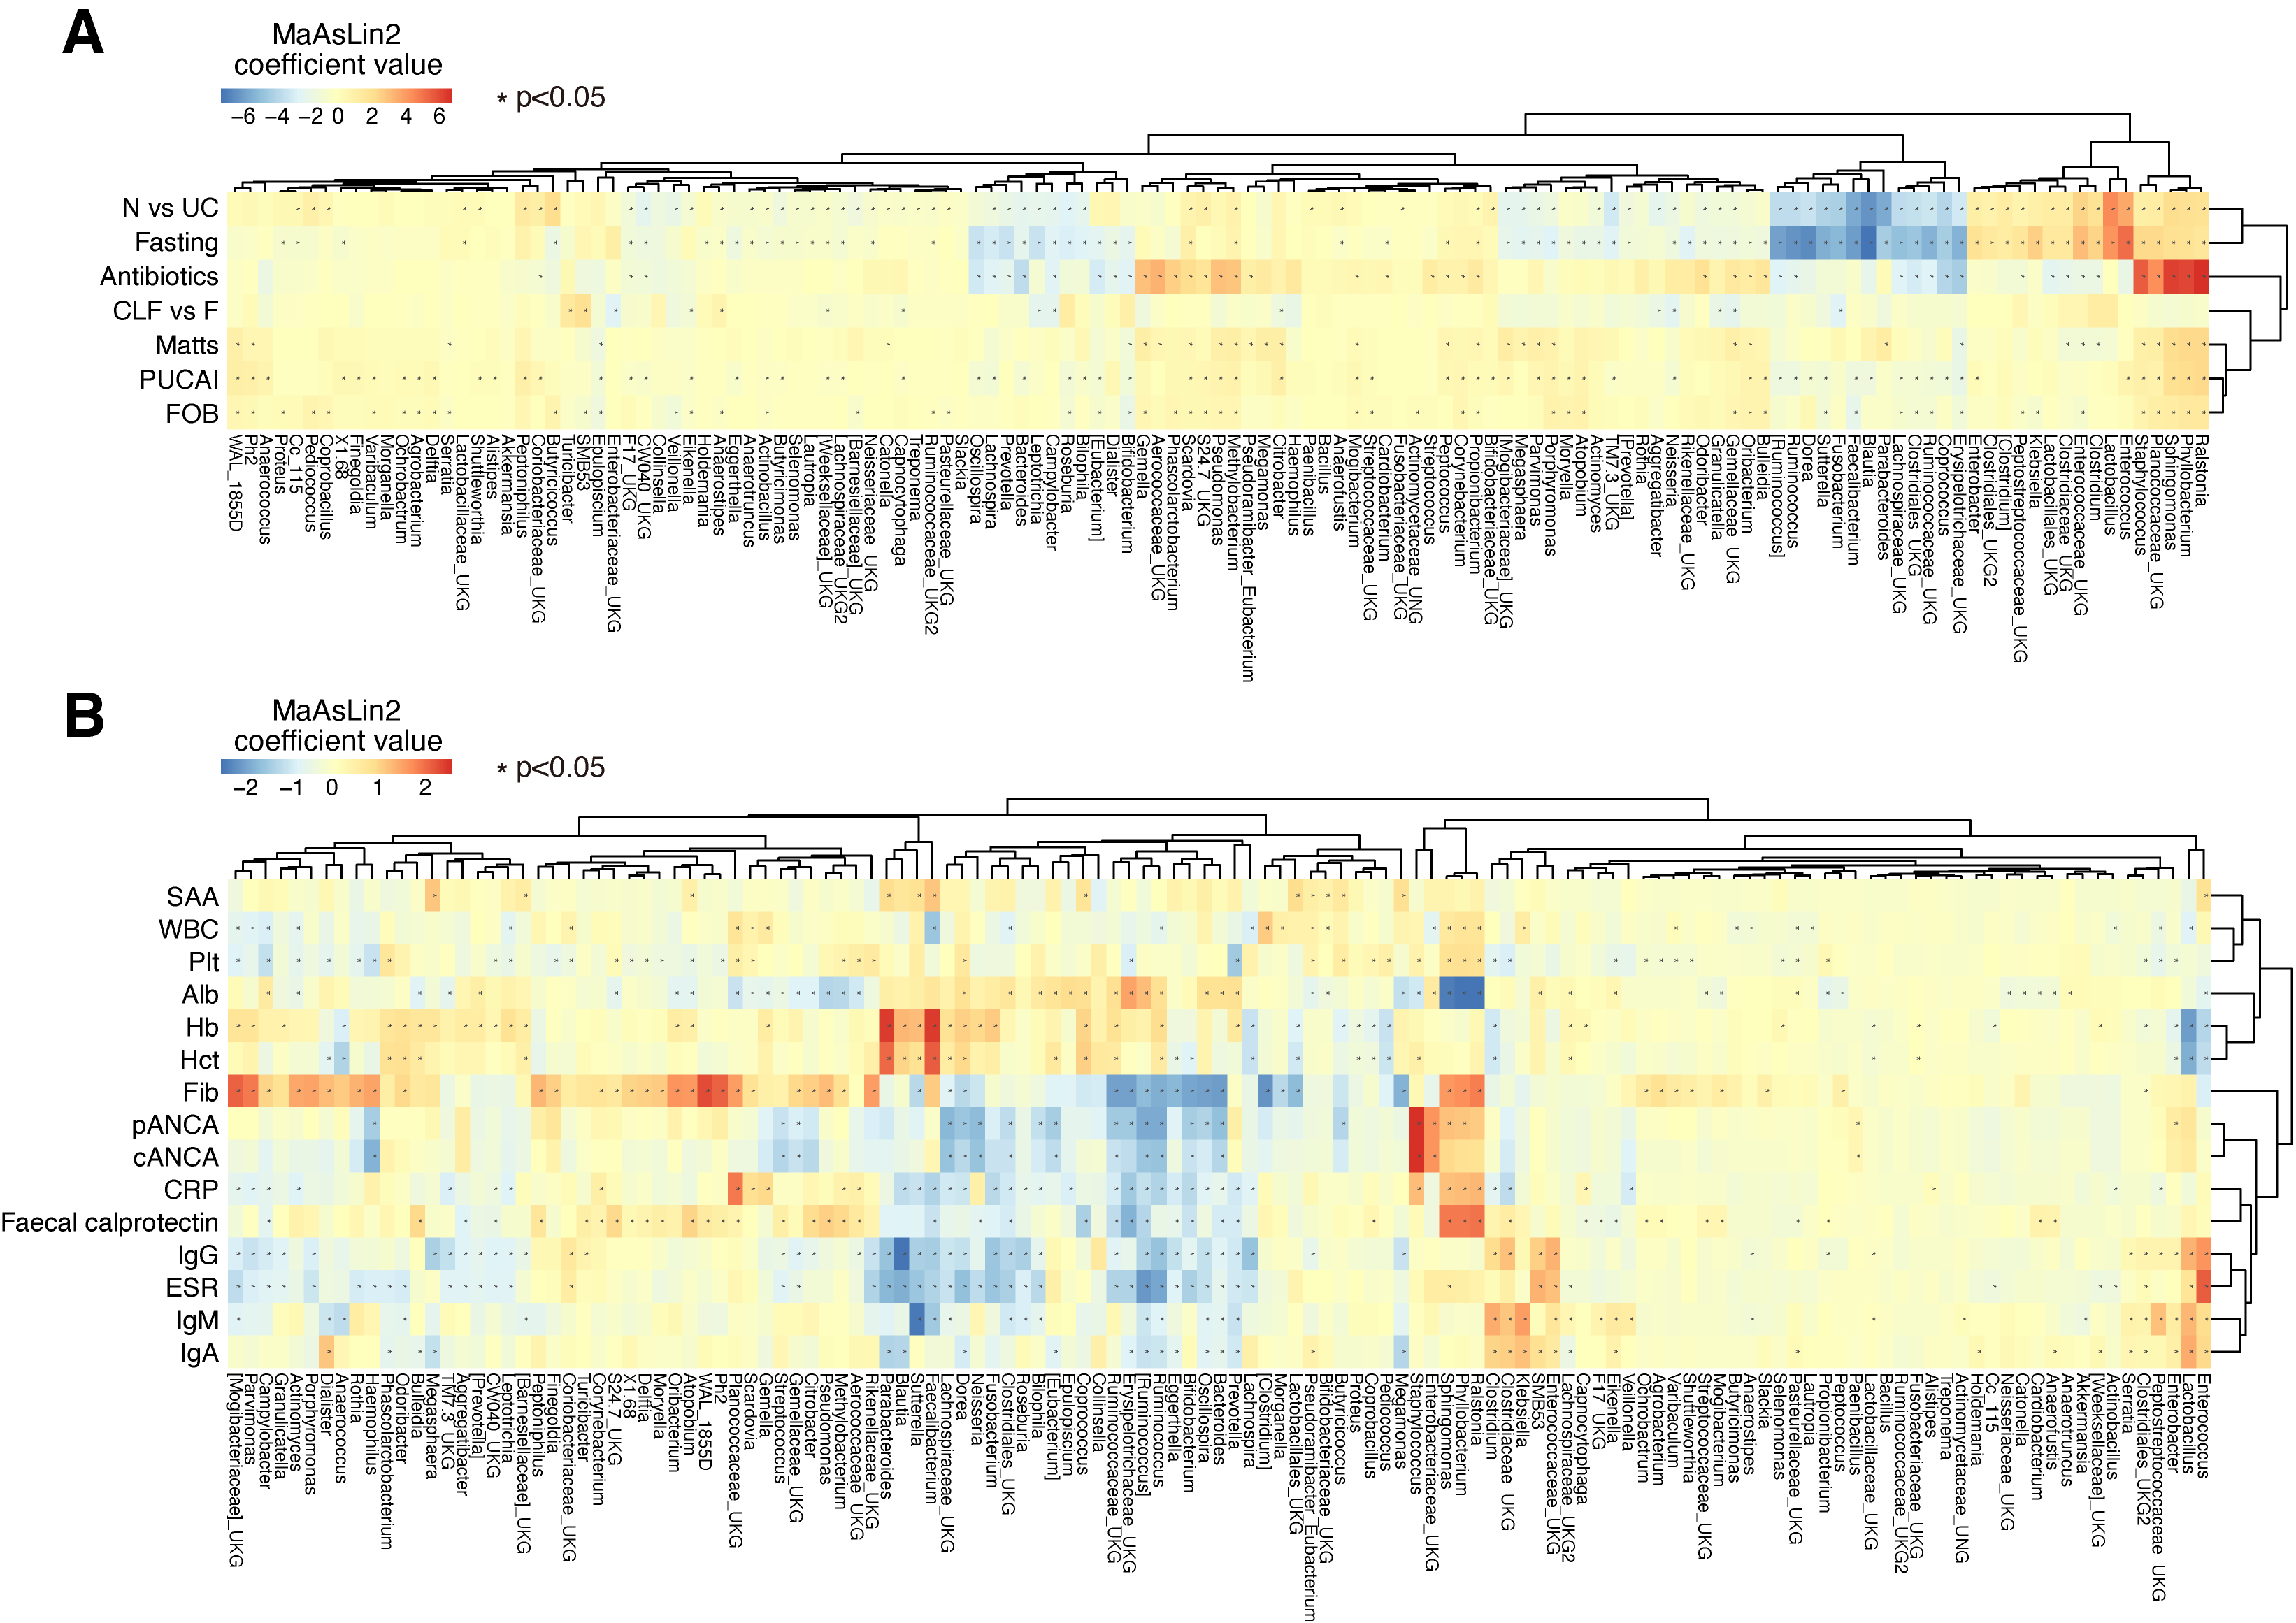
**

**Additional file 3. Association of the bacterial taxa (genus level) detected in CLF and feces with clinical metadata.** Association was evaluated by linear model coefficients (MaAsLin). Association strength is shown by coefficient value with color gradation (red, positive; blue, negative). Significant association (*p*<0.05) is indicated by *. Details of the clinical data are summarized in **Additional file 1**. **(A)** Association of each microbial taxon with disease type (non-IBD vs UC), sampling sites, sample types, disease severity (PUCAI), disease activity (remission or active), mucosal integrity (Matts), FOB, fecal calprotectin level or treatment in the pediatric patients. **(B)** Microbial taxonomic variation plotted against blood and serological analysis data of the pediatric patients.

Abbreviations: Alb, albumin; cANCA, cytoplasmic antineutrophil cytoplasmic antibodies; CLF, colon lavage fluids; CRP, C-reactive protein; ESR, erythrocyte sedimentation rate; F, feces; Fib, fibrinogen; FOB, fecal occult blood; Hb, hemoglobin; Hct, hematocrit; IBD, inflammatory bowel disease; pANCA, peripheral antineutrophil cytoplasmic antibodies; Plt, platelet count; PUCAI, Pediatric Ulcerative Colitis Activity Index; SAA, serum amyloid A protein; UC, ulcerative colitis; WBC, white blood cell count
