# Supplementary material for: Comparative analysis of mucosa-associated and luminal gut microbiota in pediatric ulcerative colitis
Source: Research Square preprint supplement (doi:10.21203/rs.3.rs-5301915/v1), 2024-10-28
Supplement: Supplementary file 3 [file 871bf0d6befbccd9faf12e32.docx]

**
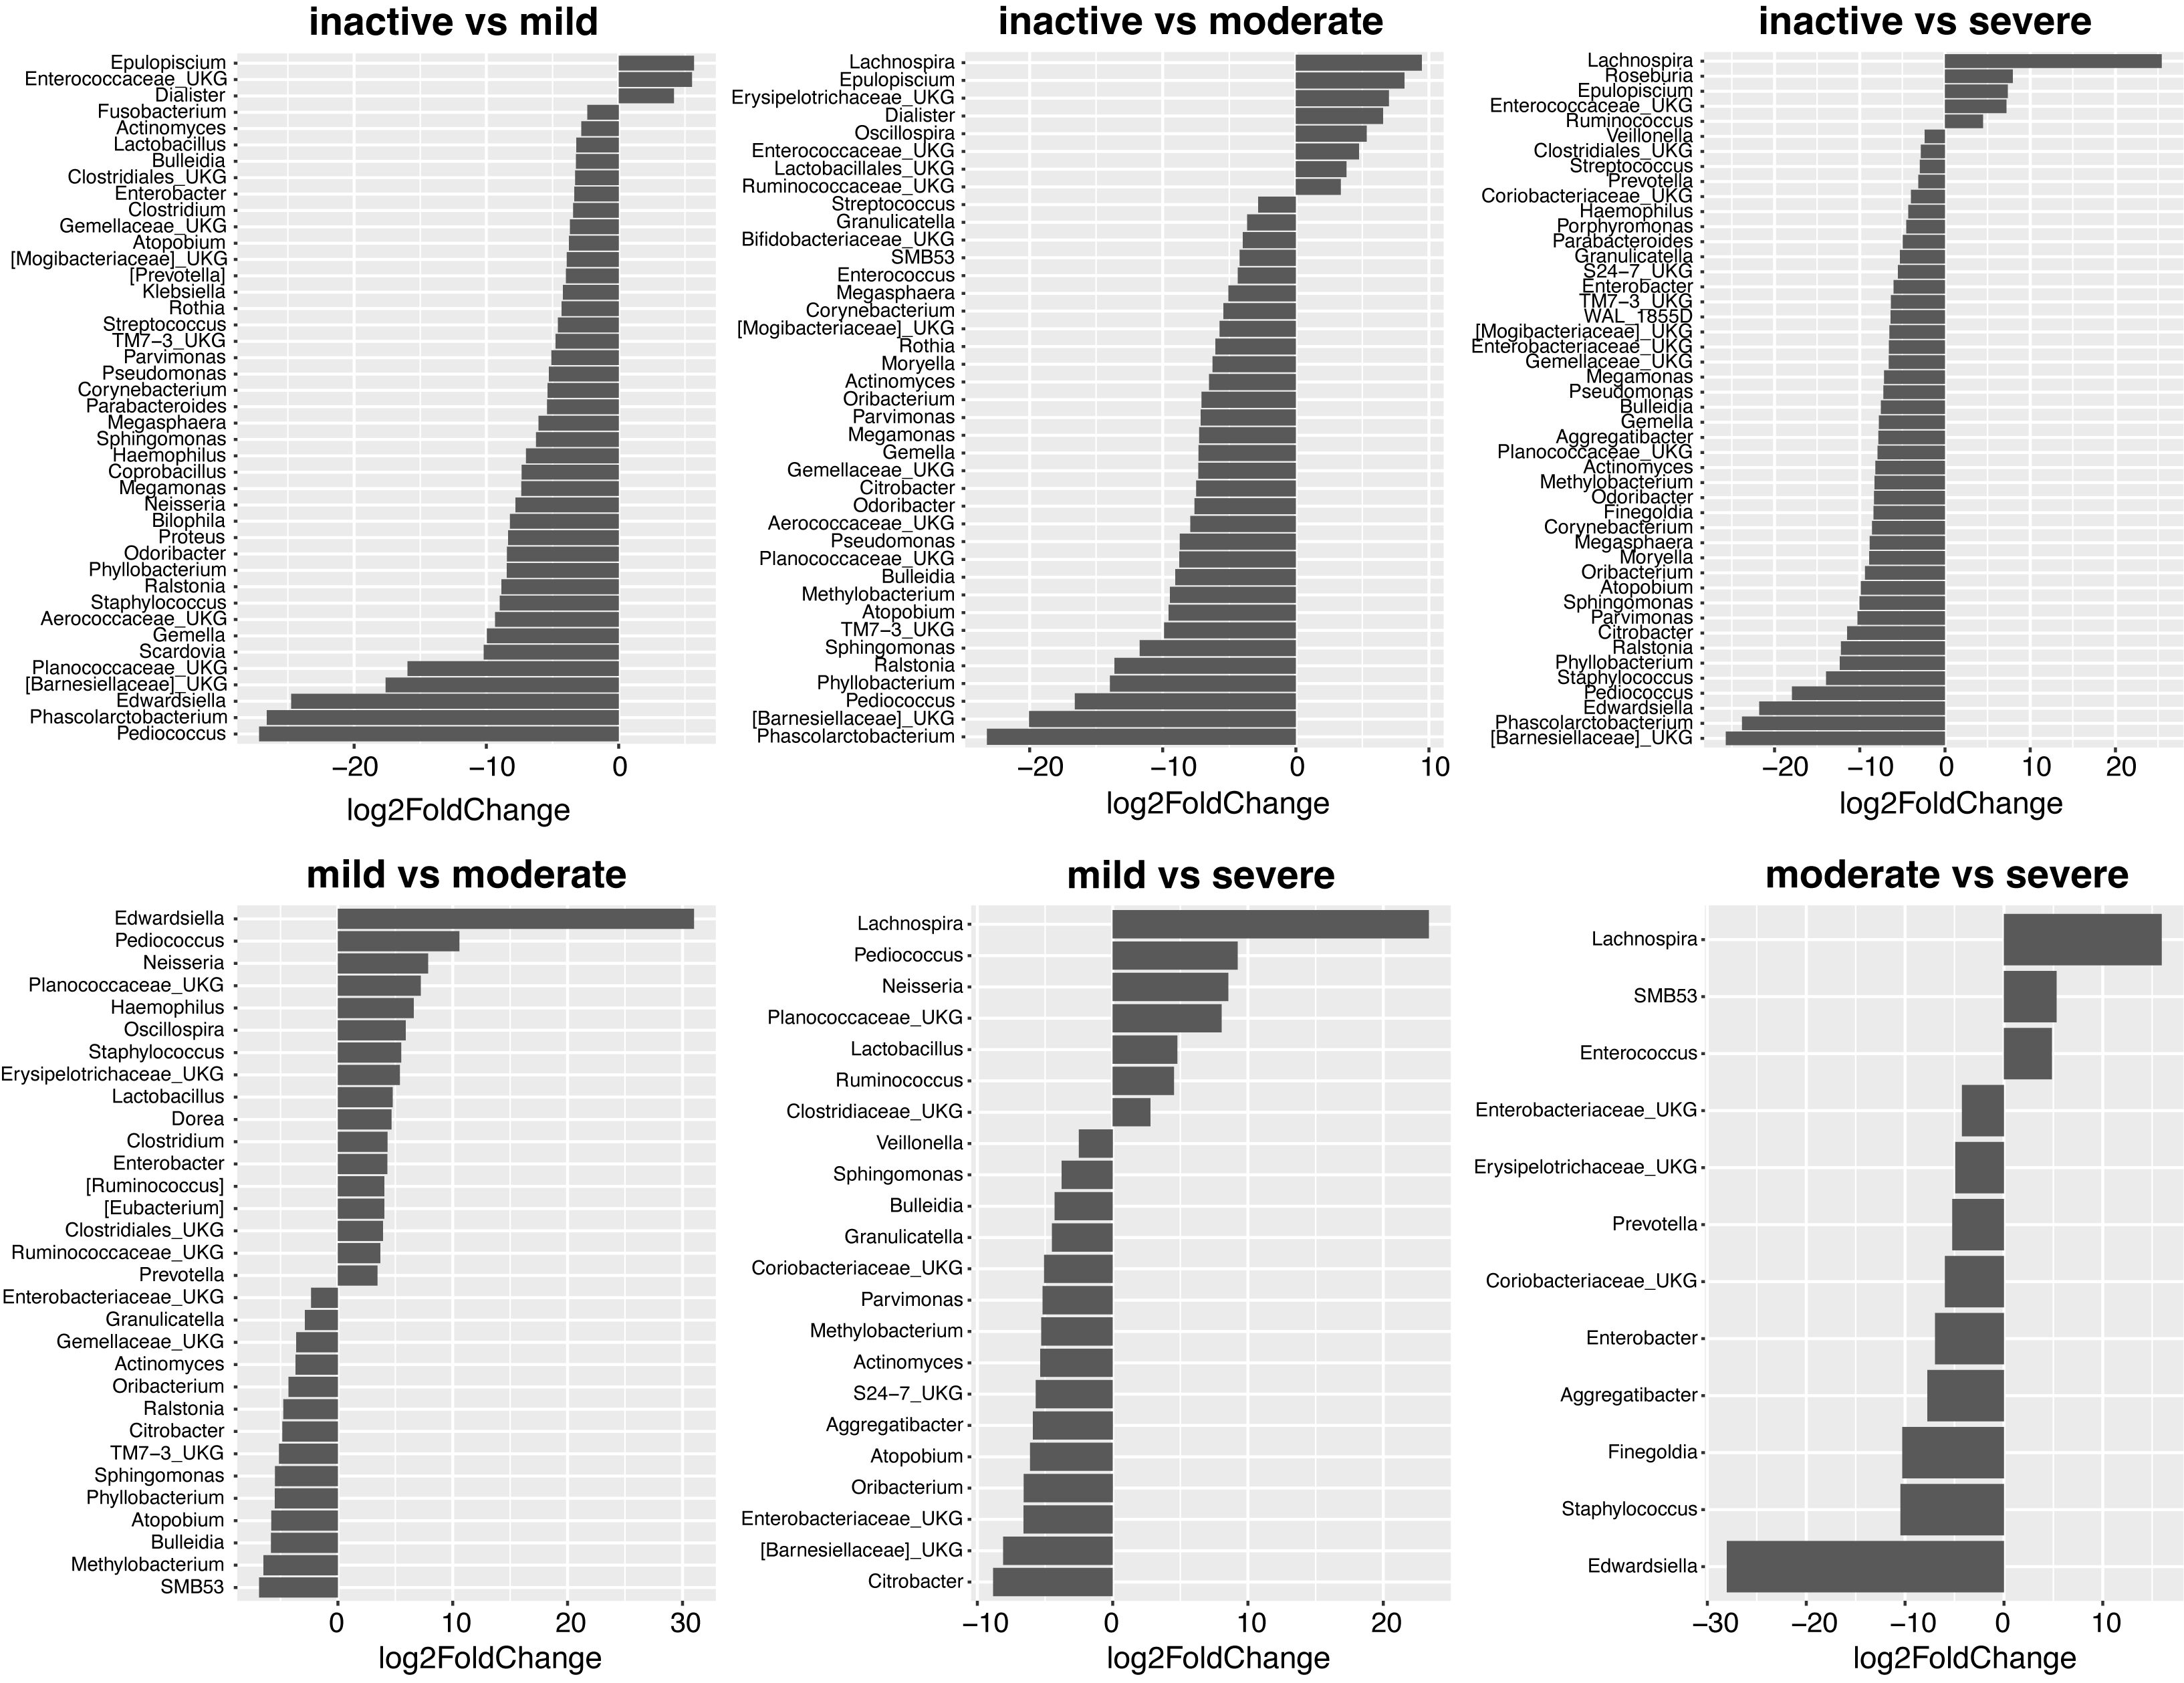
**

**Additional file 6. Pairwise comparisons of community structure among the MAM across different degrees of disease activity.** Bacterial genera enriched more than 4-fold in either of the paired disease states were detected by DESeq2 analysis. The fold change in relative abundance was logarithmically transformed and is shown by the bar diagrams.

Abbreviation: MAM, mucosa-associated microbiome
