# Supplementary material for: Comparative analysis of mucosa-associated and luminal gut microbiota in pediatric ulcerative colitis
Source: Research Square preprint supplement (doi:10.21203/rs.3.rs-5301915/v1), 2024-10-28
Supplement: Supplementary file 4 [file bf66b02473f77cd9bc32c649.docx]

**
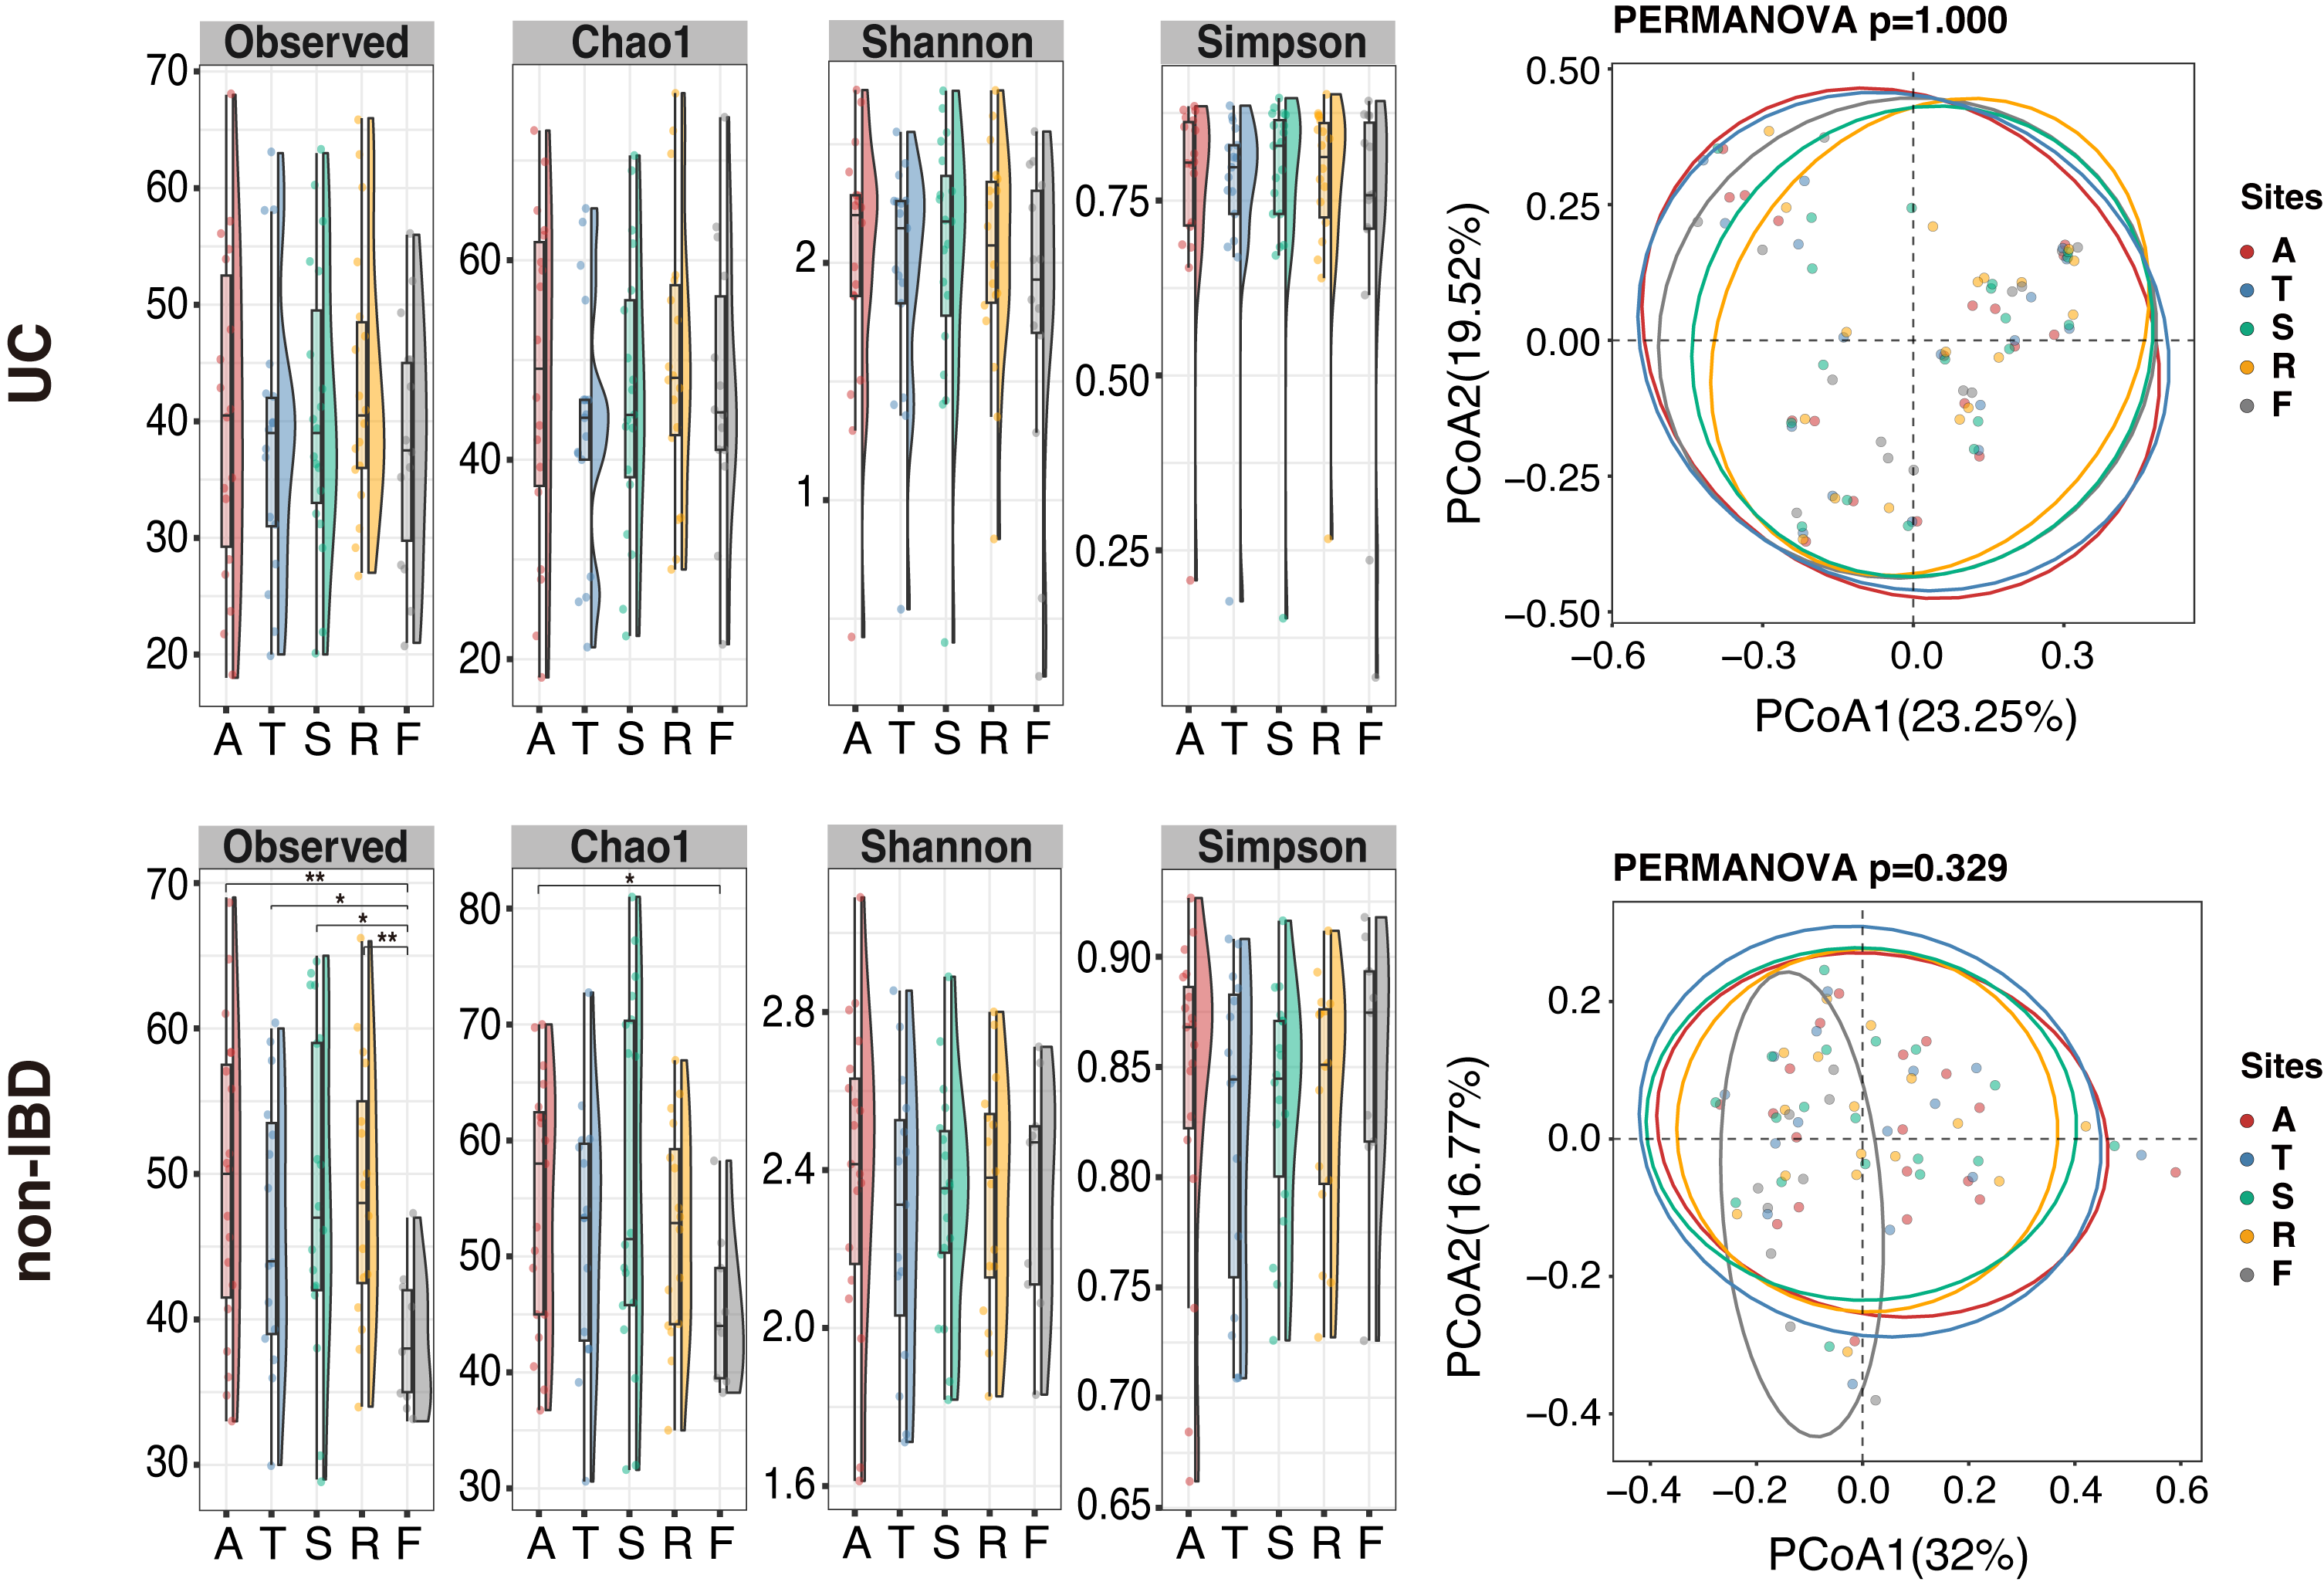
**

**Additional file 2. Comparisons of gut microbiome community structure among the sample sites in pediatric UC and non-IBD patients.** Family-level abundance was used for calculation of Bray-Curtis distance. The α-diversity (four kinds of diversity indices) and β-diversity (PCoA plot) of the microbiome were compared among the sample types (A, ascending colon; T, transverse colon; S, sigmoid colon; R, rectum; and F, feces). No significant difference among the sampling sites was detected in UC. In non-IBD patients, MAM contained more types of bacterial groups than did feces. Significant differences are shown by * (*p*<0.05) or ** (*p*<0.01).

Abbreviations: IBD, inflammatory bowel disease; MAM, mucosa-associated microbiome; PCoA, principal coordinates analysis; UC, ulcerative colitis
