# Supplementary material for: Comparative analysis of mucosa-associated and luminal gut microbiota in pediatric ulcerative colitis
Source: Research Square preprint supplement (doi:10.21203/rs.3.rs-5301915/v1), 2024-10-28
Supplement: Supplementary file 5 [file d45ac7536a7b72eead920ba1.docx]

**Additional file 1. Clinical metadata of the pediatric patients enrolled in this study.**

a) Extent of disease based on Paris Classification. E1: ulcerative proctitis, E2: left-sided UC, E3; extensive disease, E4: pancolitis.

b) PUCAI: Pediatric Ulcerative Colitis Activity Index. <10, inactive; 10-34, mild; 35-64, moderate; >65, severe.

c) Mucosal damage assessed in the UC group based on Matts classification. 1: normal, 2: mild, 3: moderate, 4: severe. In the non-IBD group, N: normal, A: abnormal. Sampling sites are indicated by A, ascending colon; T, transverse; colon; S, sigmoid colon and R, rectum. F, feces.

d) Treatment history: Abx, antibiotics within 4 weeks before the examination.

Abbreviations: Abx, antibiotics; CS, corticosteroid; IM, immunomodulatory drugs; BL, biological drugs; Alb, albumin; CRP, C-reactive protein; ESR, erythrocyte sedimentation rate; FC, fecal calprotectin; FOB, fecal occult blood test; Hb, hemoglobin; NA, not applicable; ND, no data or no sample; SAA, serum amyloid A protein; WBC, white blood cell count
