# Supplementary material for: Comparative analysis of mucosa-associated and luminal gut microbiota in pediatric ulcerative colitis
Source: Research Square preprint supplement (doi:10.21203/rs.3.rs-5301915/v1), 2024-10-28
Supplement: Supplementary file 6 [file e65753b4e1566322c0e92b1c.docx]

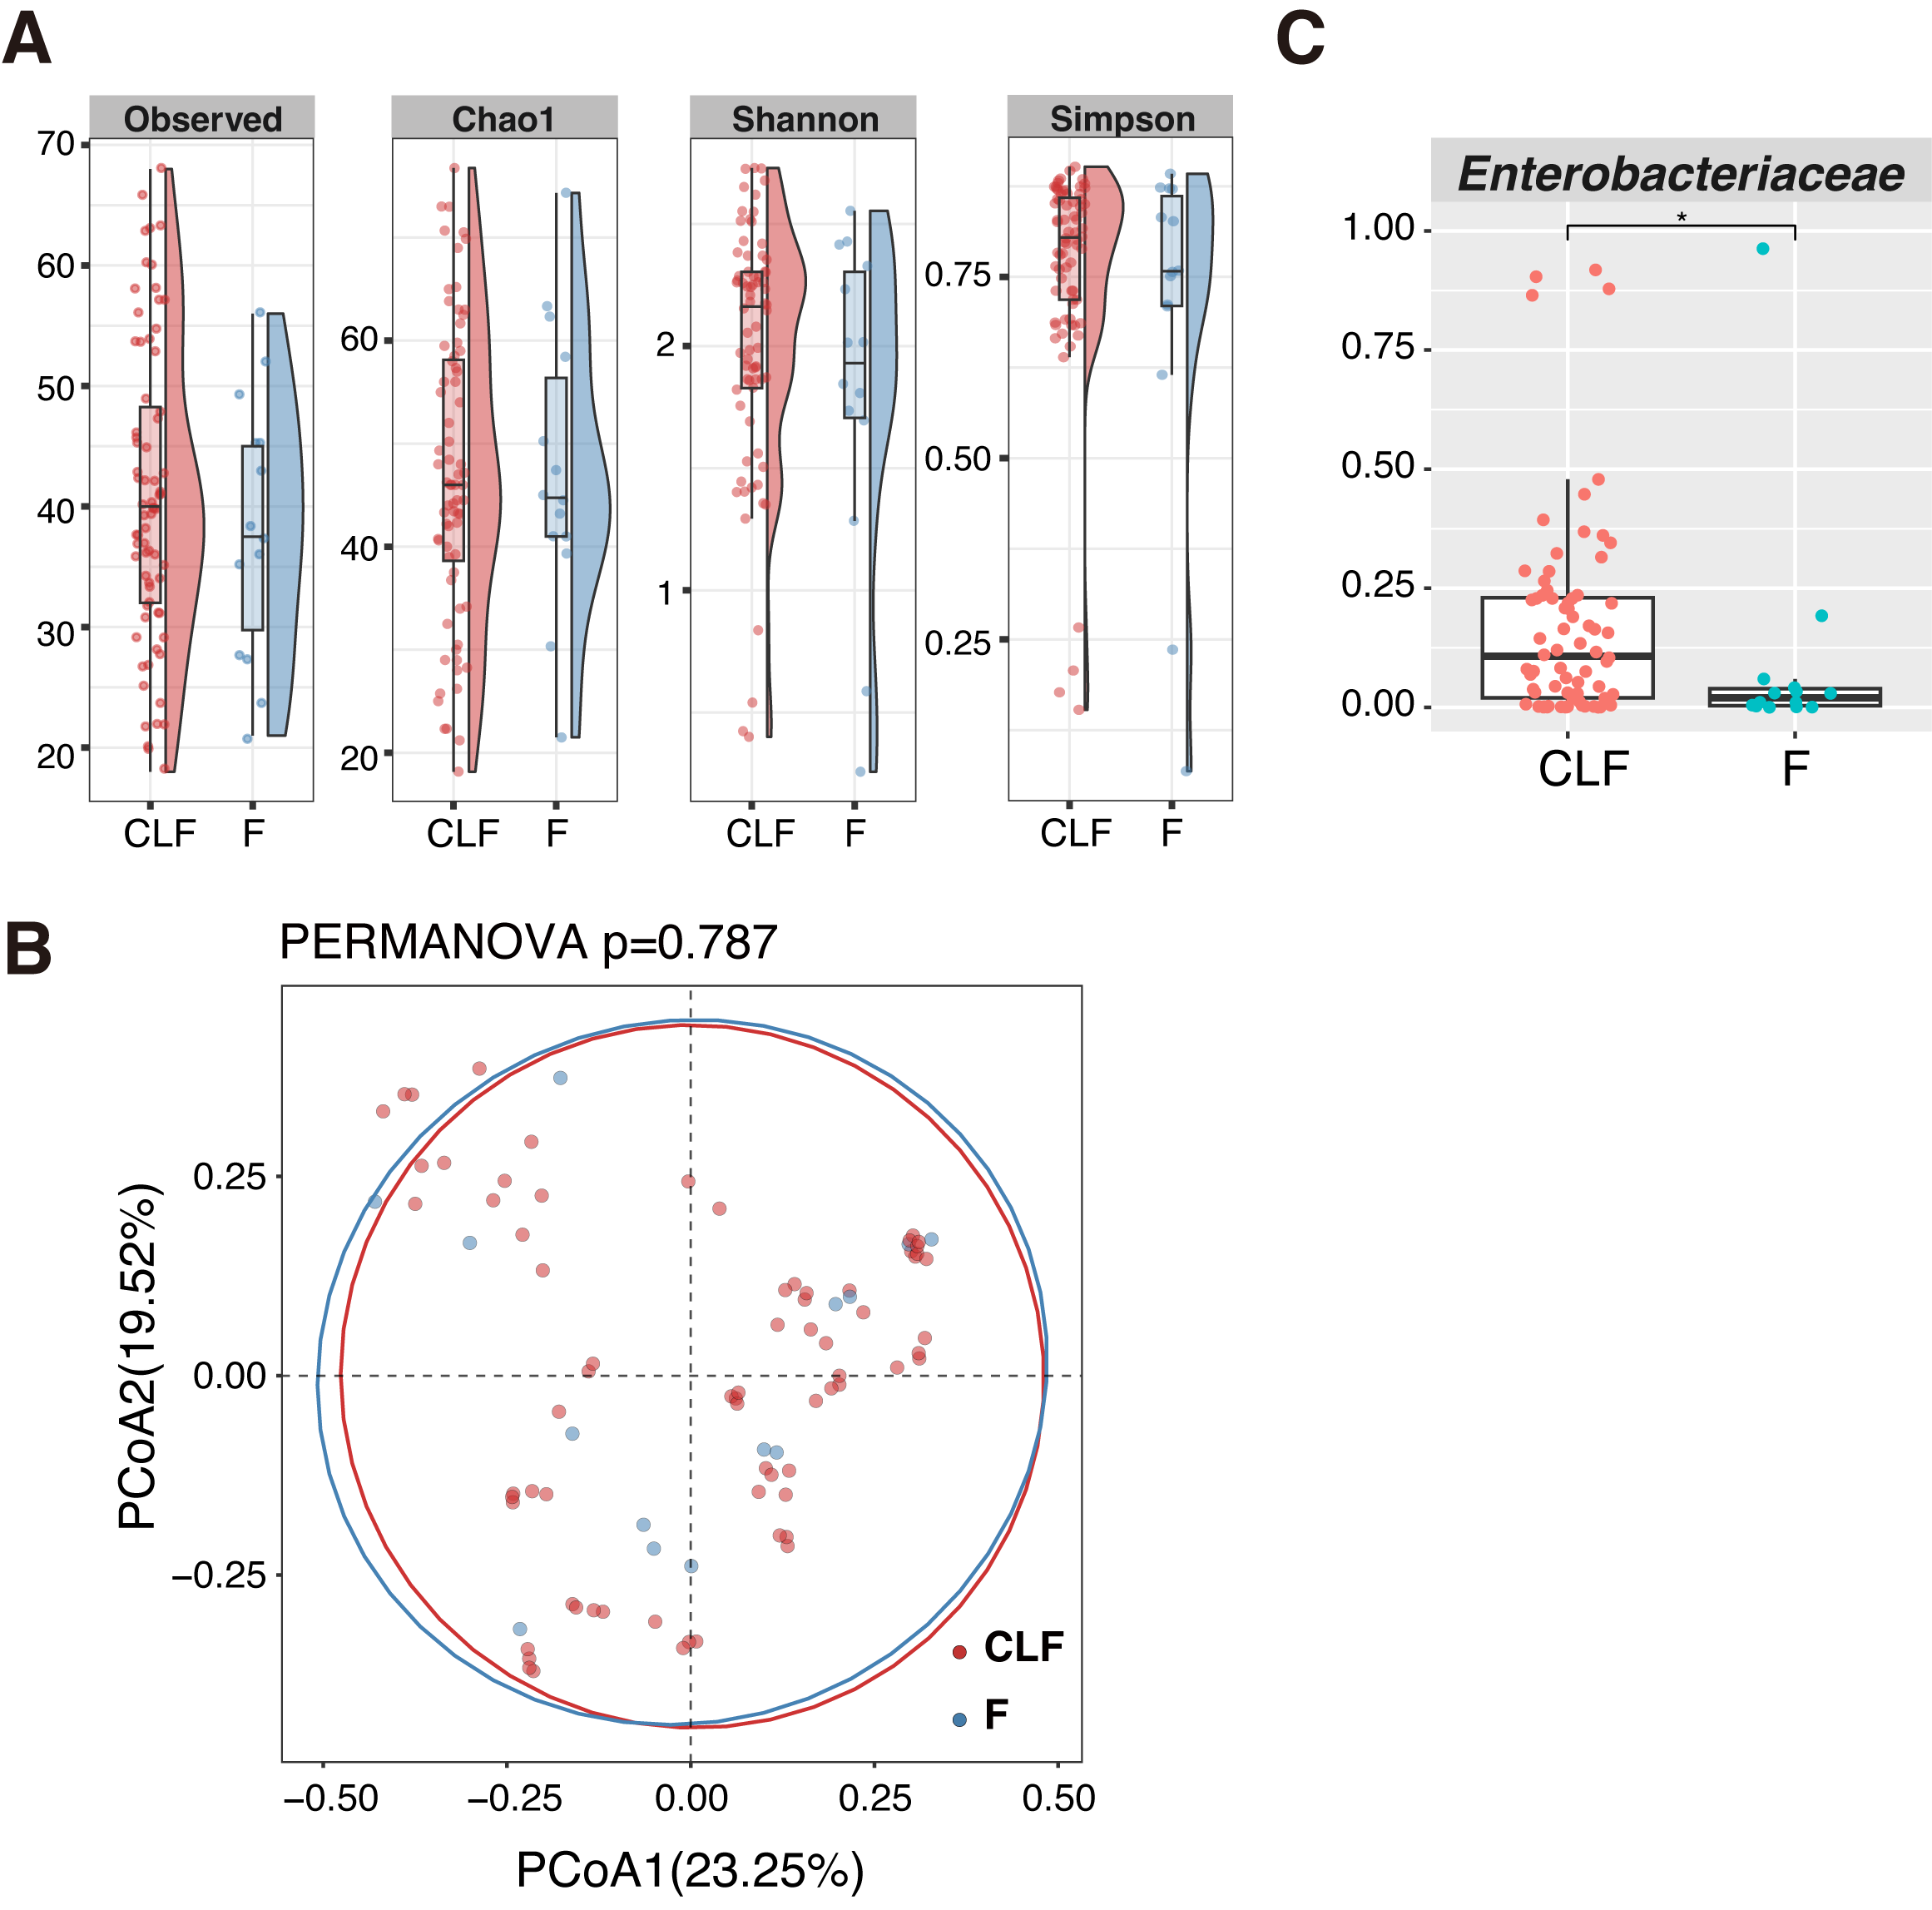


**Additional file 4. Difference between microbiota compositions of CLF and feces in pediatric UC patients.** Family-level abundance was used for calculation of Bray-Curtis distance. **(A)** Comparison of diversity indices between the gut microbiomes in CLF and F. **(B)** PCoA of the gut microbiomes in CLF and F. The statistical difference in β-diversity was evaluated by PERMANOVA (number of permutations = 9,999). **(C)** Pairwise comparisons of the taxa that were significantly different between CLF and F. Significant difference is shown by * (*p*<0.05).

Abbreviations: CLF, colon lavage fluids; F, feces; PCoA, principal coordinate analysis
